# Supplementary material for: Ultrasensitive voltammetric determination of catechol at a gold atomic cluster/poly(3,4-ethylenedioxythiophene) nanocomposite electrode
Source: Royal Society of Chemistry journal article supplement (doi:10.1039/c3an00518f), 2013-01-01
Supplement: c3an00518f.pdf [file c3an00518f.pdf]

**Ultrasensitive Voltammetric Determination of Catechol at Gold Atomic Cluster/Poly(3,4-ethylenedioxythiophene) Nanocomposite Electrode**

Sindhu R. Nambiar, Padamadathil K. Aneesh and Talasila P. Rao\*

*Chemical Sciences & Technology Division (CSTD),*

*CSIR–National Institute for Interdisciplinary Science & Technology (CSIR–NIIST),*

*Trivandrum 695019, INDIA. \*e-mail: [tprasadarao@rediffmail.com](mailto:tprasadarao@rediffmail.com)*

Corresponding author: **Dr. T. Prasada Rao**,  
Chief Scientist, Chemical Sciences & Technology Division,  
National Institute for Interdisciplinary Science & Technology,  
Trivandrum – 695 019, India  
Email: [tprasadarao@rediffmail.com](mailto:tprasadarao@rediffmail.com)  
Ph: 91-471-2515317  
Fax: 91-471-2491712

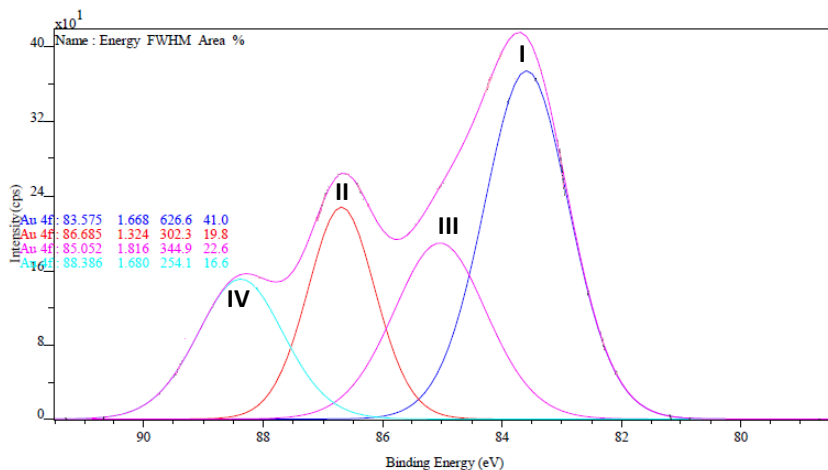

**Figure S1:** XPS spectra of electrochemically synthesized Au clusters in presence of 50mM CTAB

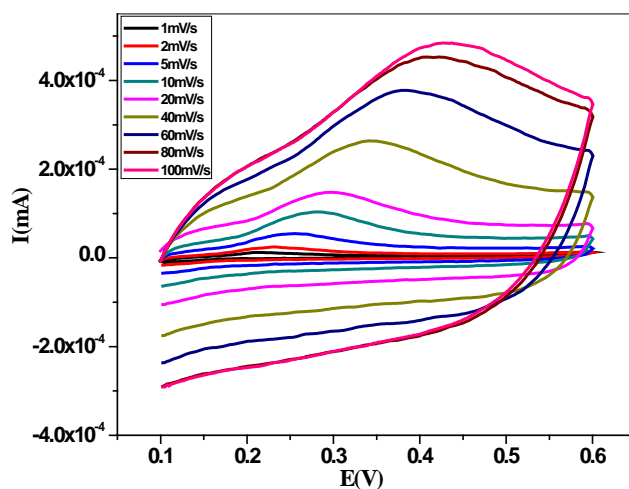

**Figure S2**

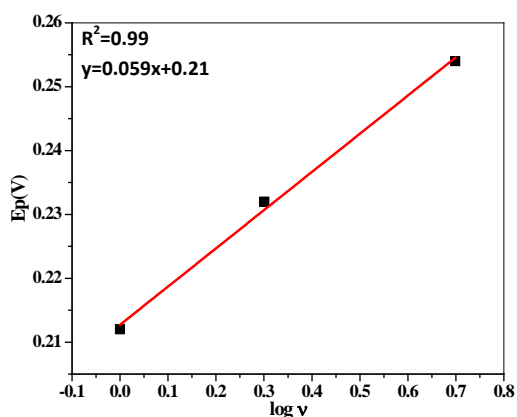

**Figure S2 (i)**

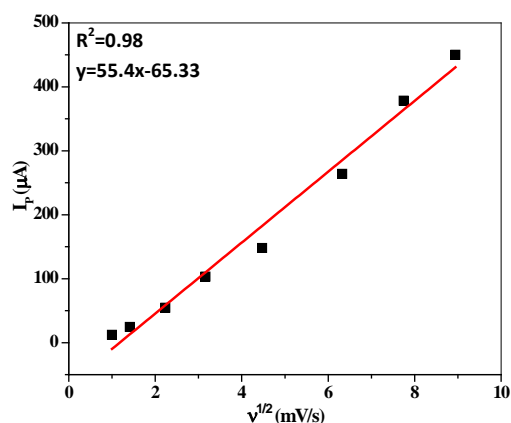

**Figure S2 (ii)**

**Figure S2:** Cyclic voltammograms of oxidation of catechol ( $10^{-4}$  M) at various scan rates (1 to 100mV/s) at AuAC/PEDOT/Au nanocomposite modified gold electrode, Figure S2 (i): Plot of  $E_p$  Vs  $\log v$ , Figure S2 (ii): Plot of  $I_p$  Vs  $v^{0.5}$

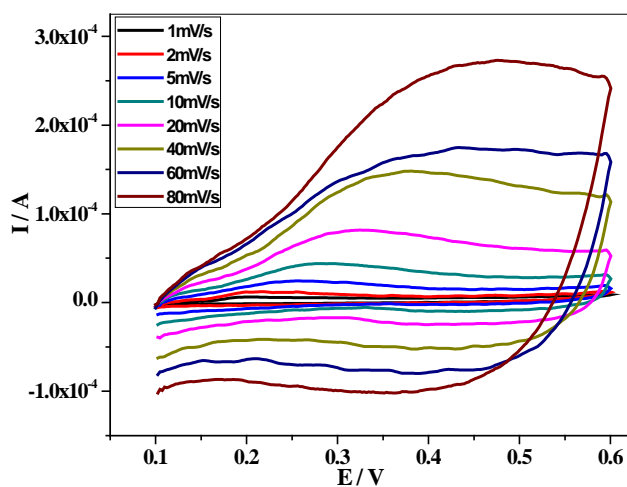

**Figure S3**

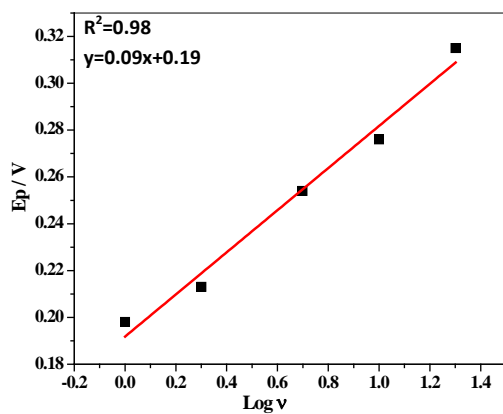

**Figure S3 (i)**

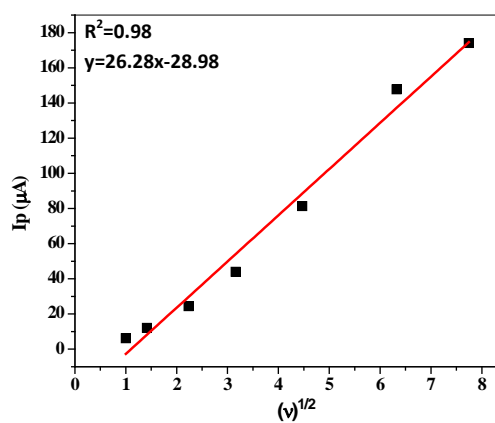

**Figure S3 (ii)**

**Figure S3:** Cyclic voltammograms of oxidation of catechol ( $10^{-4}$  M) at PEDOT/Au electrode, Figure S3 (i): Plot of  $E_p$  Vs  $\log v$ , Figure S3 (ii): Plot of  $I_p$  Vs  $v^{0.5}$

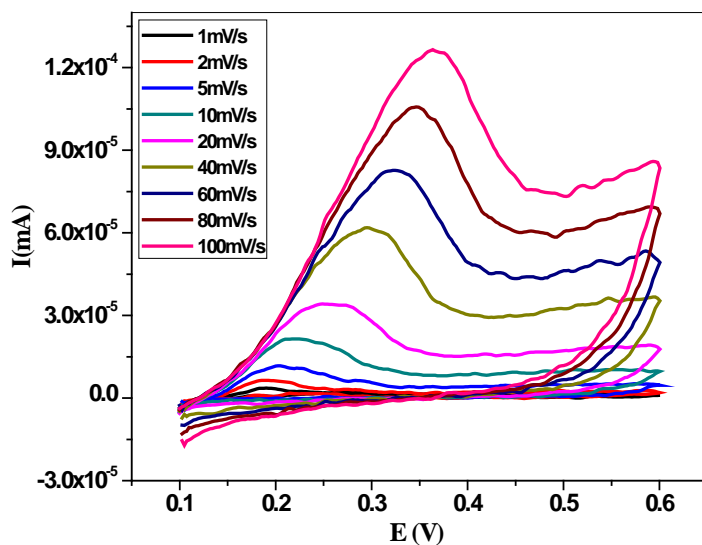

Figure S4

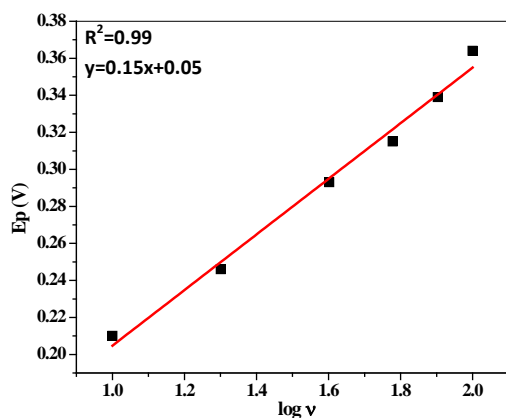

Figure S4 (i)

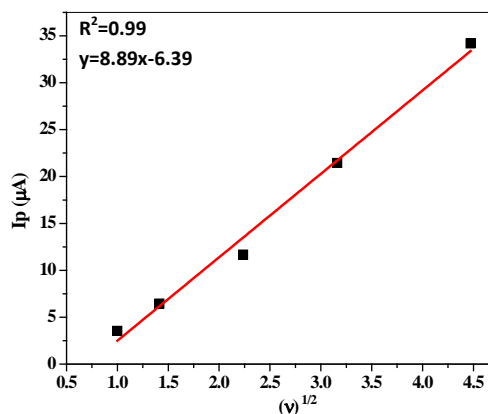

Figure S4 (ii)

**Figure S4:** Cyclic voltammograms of oxidation of catechol ( $10^{-4}$  M) at various scan rates (1 to 100mV/s) at bare gold electrode, Figure S4 (i): Plot of  $E_p$  Vs  $\log v$ , Figure S4 (ii): Plot of  $I_p$  Vs  $v^{0.5}$

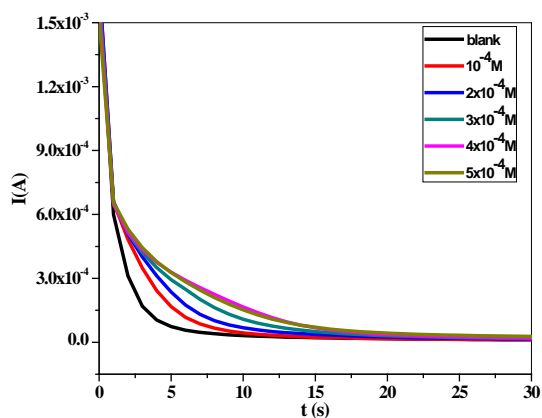

**Figure S5**

**Figure S5:** Current–time curves of AuAC/PEDOT nanocomposite electrode absence and presence of  $10^{-4}$ ,  $2 \times 10^{-4}$ ,  $3 \times 10^{-4}$ ,  $4 \times 10^{-4}$  and  $5 \times 10^{-4}$  M of catechol in 0.1M acetate buffer (pH=6.8) and 5mM Cu(II), Figure S5(i): Dependence of  $I_C/I_L$  on (time)<sup>0.5</sup>

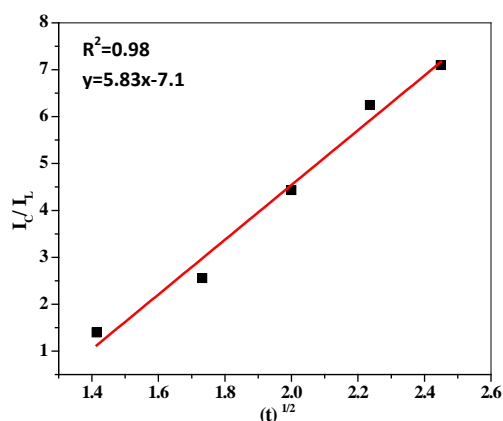

**Figure S5 (i)**

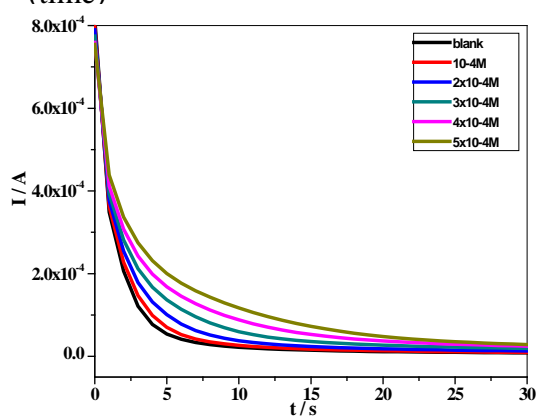

**Figure S6**

**Figure S6:** Current–time curves of PEDOT/Au electrode absence and presence of  $10^{-4}$ ,  $2 \times 10^{-4}$ ,  $3 \times 10^{-4}$ ,  $4 \times 10^{-4}$  and  $5 \times 10^{-4}$  M of catechol in 0.1M acetate buffer (pH=6.8) and 5mM Cu(II), Figure S6(i): Dependence of  $I_C/I_L$  on (time)<sup>0.5</sup>

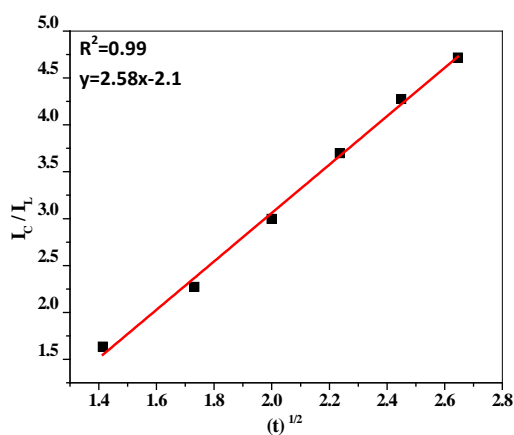

**Figure S6 (i)**

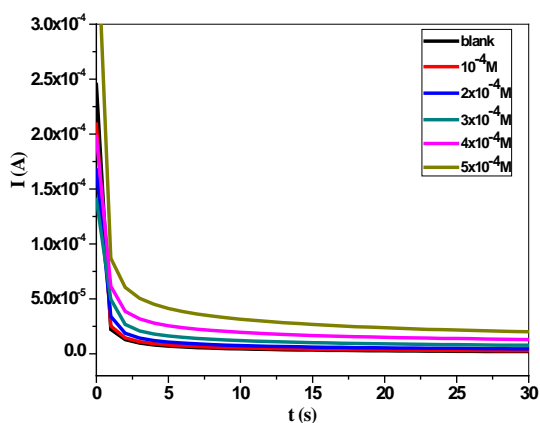

**Figure S7**

**Figure S7:** Current–time curves of bare gold electrode absence and presence of  $10^{-4}$ ,  $2 \times 10^{-4}$ ,  $3 \times 10^{-4}$ ,  $4 \times 10^{-4}$  and  $5 \times 10^{-4}$  M of catechol in 0.1M acetate buffer (pH=6.8) and 5mM Cu(II), Figure S7(i): Dependence of  $I_C/I_L$  on (time)<sup>0.5</sup>

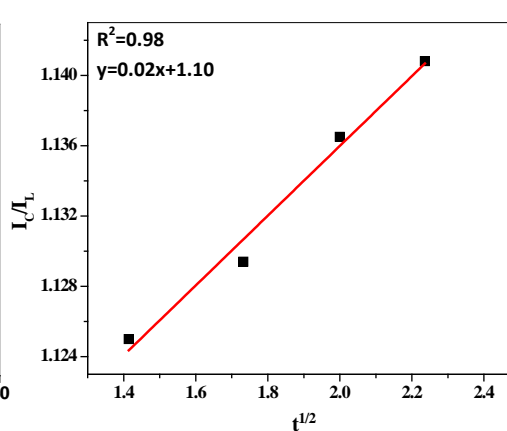

**Figure S7 (i)**

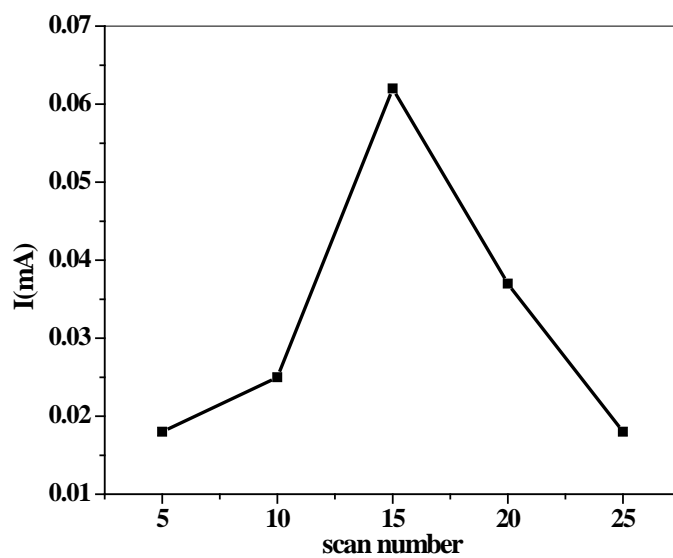

**Figure S8:** Effect of scan number of PEDOT film formation on the peak current of catechol ( $10^{-6}$ M)

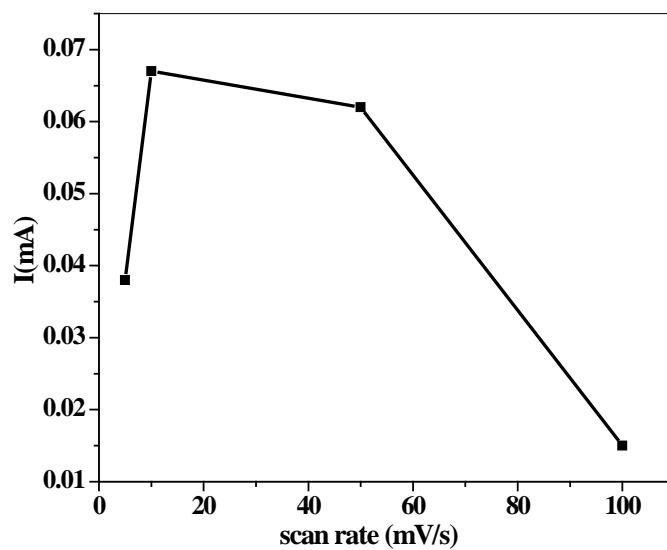

**Figure S9:** Effect of scan rate during PEDOT film formation on the peak current of catechol ( $10^{-6}$ M)

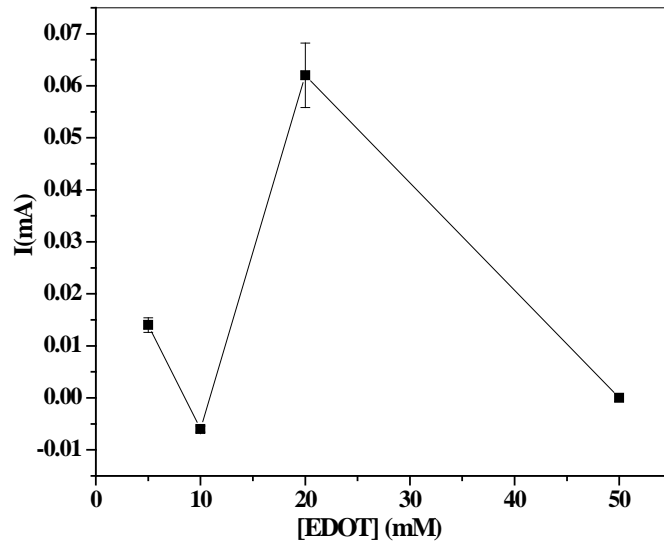

**Figure S10:** The effect of EDOT concentration on the peak current of catechol ( $10^{-6}$ M)

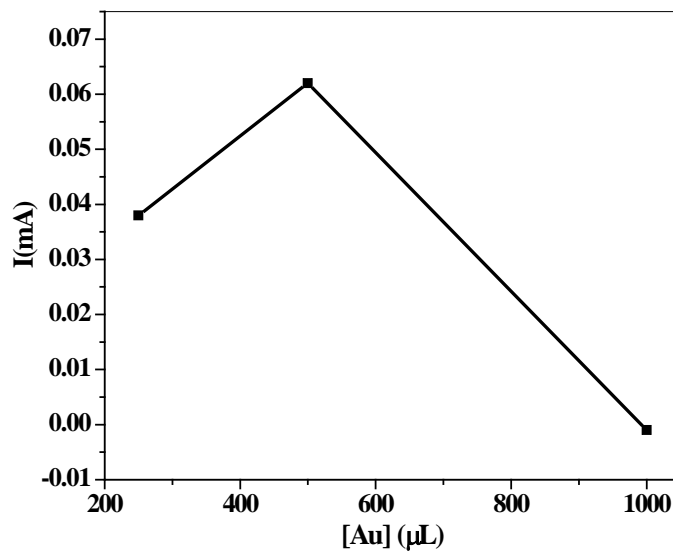

**Figure S11:** The effect of AuAC concentration on the peak current of catechol ( $10^{-6}$ M)

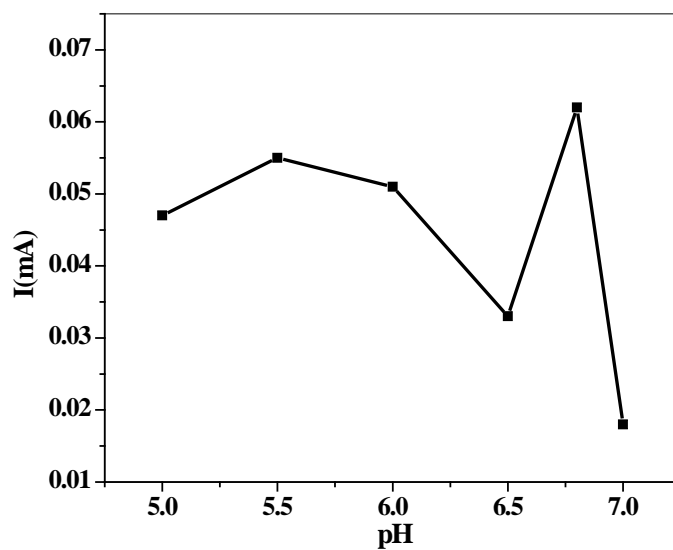

**Figure S12:** The effect of solution pH on the peak current of catechol ( $10^{-6}$ M)

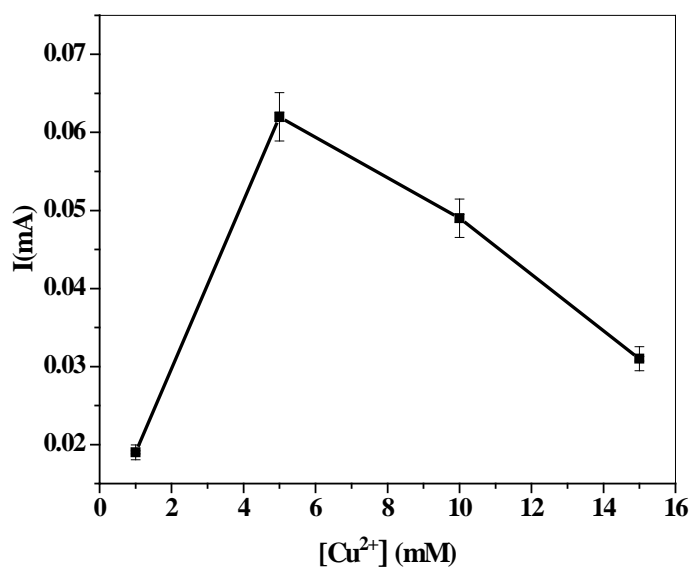

**Figure S13:** The effect of  $\text{Cu}^{2+}$  concentration on the peak current of catechol ( $10^{-6}$ M)



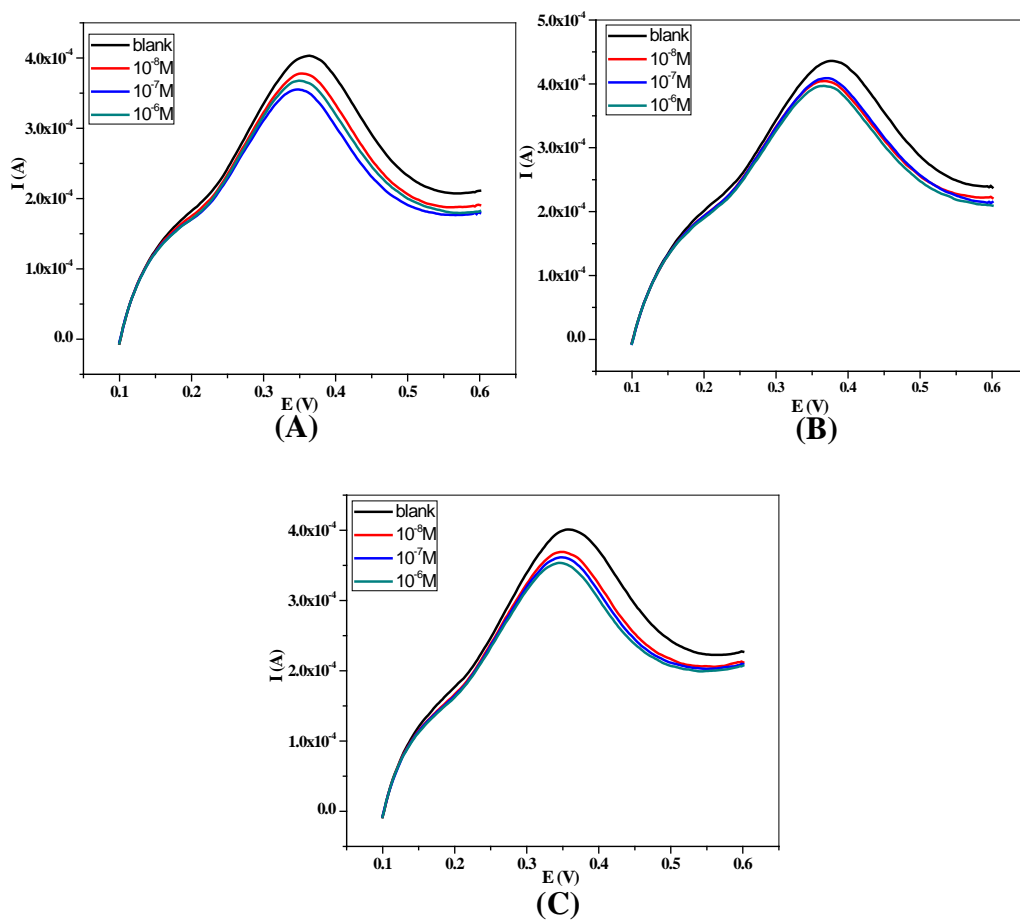

**Figure S14:** Linear sweep voltammograms for real sample analysis A) well water B) river water C) tap water of blank,  $10^{-8}$ M,  $10^{-7}$ M and  $10^{-6}$ M concentrations of catechol.

**Table S1:** Investigated and optimized conditions for the formation of AuAC/PEDOT nanocomposite modified electrode

| Parameters                      | Investigated range | Optimal conditions |
|---------------------------------|--------------------|--------------------|
| EDOT concentration (mM)         | 5 to 50            | 20                 |
| Scan number                     | 5 to 25            | 15                 |
| Gold cluster concentration (mL) | 0.25 to 1          | 0.5                |
| Scan rate (mV/s)                | 10 to 100          | 50                 |

**Table S2:** Sequential optimization of analytical parameters for catechol determination

| Analytical parameters                 | Tested range | Optimal condition          |
|---------------------------------------|--------------|----------------------------|
| <b>A. Chemical</b>                    |              |                            |
| (i) Supporting electrolyte            |              | 0.1M CH <sub>3</sub> COONa |
| (ii) pH                               | 5–7          | 6.8                        |
| (iii) Copper ion concentration (mM)   | 1–15         | 5                          |
| <b>B. Instrumental</b>                |              |                            |
| (iv) Scan rate (mV/s)                 | 10–100       | 50                         |
| (v) Cathodic potential scan limit (V) | 0.05–0.2     | 0.1                        |
| (vi) Anodic potential scan limit (V)  | 0.5–0.7      | 0.6                        |

**Table S3:** Comparison with reported electrochemical sensors for the determination of catechol

| Electrochemical technique | Electrode modification                                                                  | Calibration range ( $\mu\text{M}$ ) | Limit of detection ( $\mu\text{M}$ ) | References     |
|---------------------------|-----------------------------------------------------------------------------------------|-------------------------------------|--------------------------------------|----------------|
| DPV                       | PEDOP/MWCNTs-Pd/GC E                                                                    | 0.01–6000                           | 0.026                                | [40]           |
| DPV                       | carbon nanofibers/gold nanoparticles/Au                                                 | 5.0–350                             | 0.36                                 | [41]           |
| DPV                       | poly(glutamic acid) Modified GC Electrode                                               | 1–80                                | 0.8                                  | [42]           |
| SWV                       | screen printed graphite electrode                                                       | 1–100                               | 0.29                                 | [43]           |
| Amperometry               | Au/TiO <sub>2</sub> nanorod composites-modified BDD electrodes                          | 5–200                               | 1.4                                  | [44]           |
| Amperometry               | DeniLite laccase immobilized Pt electrode                                               | 0–58                                | 0.07                                 | [45]           |
| CV                        | AuNP-SAMs/Au                                                                            | 4–20                                | 4                                    | [46]           |
| CV                        | Molecularly Imprinted Conducting Polymer/Au                                             | 0.228–144                           | 0.228                                | [32]           |
| Amperometry               | CNT-Tyr composite                                                                       | 0–150                               | 10                                   | [47]           |
| CV                        | MIP/Au                                                                                  | 0–100                               | 0.029                                | [33]           |
| Amperometry               | poly(aniline-co-p-aminophenol) film                                                     | 5–500                               | 0.8                                  | [48]           |
| Amperometry               | montmorillonite modified graphite electrode                                             | 10–1000                             | 1.13                                 | [49]           |
| DPV                       | $\beta$ -cyclodextrin-cobalt ferrite nanocomposite                                      | 1–200                               | 0.12                                 | [50]           |
| DPV                       | Bis(1,10-phenanthroline)copper(II)bis(tetracyanoquinodimethanide) in poly-L-lysine film | 0.01–20                             | 0.003                                | [51]           |
| DPV                       | (PEDOT)/graphene oxide (GO) hybrid film                                                 | 2 to 400                            | 1.6                                  | [52]           |
| LSV                       | AuAC/PEDOT/Au                                                                           | $1 \times 10^{-4}$ –10              | $6.3 \times 10^{-6}$                 | Present method |

(CV: Cyclic voltammetry, SWV: Square wave voltammetry, DPV: Differential pulse voltammetry).
